# Supplementary material for: Strontium Chloride Improves Reproductive Function and Alters Gut Microbiota in Male Rats
Source: MDPI journal article supplement (doi:10.3390/ijms241813922), 2023-09-10
Supplement: s1 [file s1]

## Supplementary Material

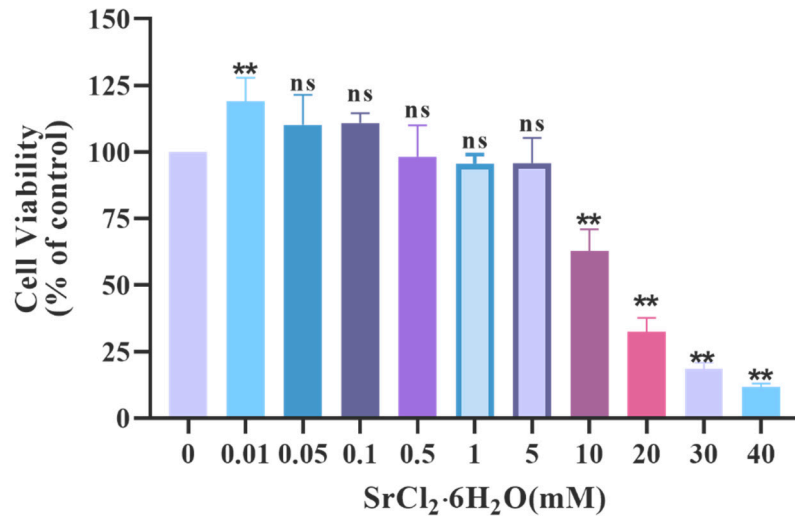

**Figure S1.** Effect of  $\text{SrCl}_2 \cdot 6\text{H}_2\text{O}$  on cell viability of TM4 cells. Cell viability was detected using CCK-8 assay. Compared with the control group, \*  $p < 0.05$  and \*\*  $p < 0.01$ .
